# Supplementary material
Source: PubMed Central journal article supplement (PMC2640423)

# **NHC-Catalyzed Reactions of Aryloxyacetaldehydes: A Domino/Elimination/Conjugate Addition/Acylation Process for the Synthesis of Substituted Coumarins**

**Eric M. Phillips, Manabu Wadamoto, Howard S. Roth, Andrew W. Ott and Karl A. Scheidt\***

*Department of Chemistry, Northwestern University,  
2145 Sheridan Road, Evanston, Illinois 60208*

## **Supporting Information**

|                                                                                                |     |
|------------------------------------------------------------------------------------------------|-----|
| General Information.....                                                                       | S2  |
| General Procedure for the Synthesis of Aryloxy-acetaldehydes, illustrated with <b>1a</b> ..... | S2  |
| General Procedure for the Synthesis of 3,4-Dihydrocoumarins.....                               | S3  |
| Selected NMR Spectra.....                                                                      | S8  |
| Procedure and Mass Spectrometry of Crossover Experiment.....                                   | S20 |
| X-Ray Crystallography of <b>2b</b> :.....                                                      | S23 |

## General Information

All reactions were carried out under a nitrogen atmosphere in flame-dried glassware with magnetic stirring. CH<sub>3</sub>CN was purified by passage through a bed of activated alumina.<sup>1</sup> Reagents were purified prior to use unless otherwise stated following the guidelines of Perrin and Armarego.<sup>2</sup> Purification of reaction products was carried out by flash chromatography using EM Reagent silica gel 60 (230-400 mesh). Analytical thin layer chromatography was performed on EM Reagent 0.25 mm silica gel 60-F plates. Visualization was accomplished with UV light and ceric ammonium nitrate stain or potassium permanganate stain followed by heating. Infrared spectra were recorded on a Perkin Elmer 1600 series FT-IR spectrometer. <sup>1</sup>H-NMR spectra were recorded on a Varian Inova 500 (500 MHz) spectrometer and are reported in ppm using solvent as an internal standard (CDCl<sub>3</sub> at 7.26 ppm). Data are reported as (ap = apparent, s = singlet, d = doublet, t = triplet, q = quartet, m = multiplet, b = broad; coupling constant(s) in Hz; integration. Proton-decoupled <sup>13</sup>C-NMR spectra were recorded on a Varian Inova 500 (125 MHz) spectrometer and are reported in ppm using solvent as an internal standard (CDCl<sub>3</sub> at 77.0 ppm). Mass spectra data were obtained on a Varian 1200 Quadrupole Mass Spectrometer and Micromass Quadro II Spectrometer.

## General Procedure for the Synthesis of Aryloxy-acetaldehydes, illustrated with **1a**

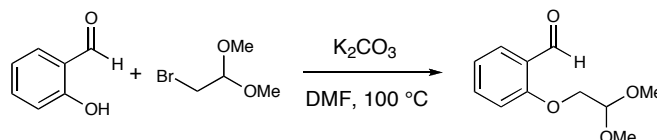

To a flame-dried 100 mL round bottom flask equipped with magnetic stirring bar, septum, and gas inlet was added salicyl aldehyde (2 mL, 20.0 mmol), DMF (20 mL, 1 M), and K<sub>2</sub>CO<sub>3</sub> (2.80 g, 20.00 mmol). Bromoacetaldehyde dimethyl acetal (2.37 mL, 20.00 mmol) was added via syringe. The flask was then equipped with reflux condenser, placed in an oil bath, and heated to 100 °C. After 48 hrs the reaction was cooled to 23 °C. The mixture was diluted with Et<sub>2</sub>O (50 mL) and washed with water (10 x 5 mL) and brine (10 mL). The organic layer was dried over Na<sub>2</sub>SO<sub>4</sub>, filtered, and concentrated *in vacuo*. The resulting mixture was purified by flash column chromatography on silica gel with 20% EtOAc in hexanes as an eluent to afford 2.40 g (57% yield) of the aldehyde as a light yellow oil.

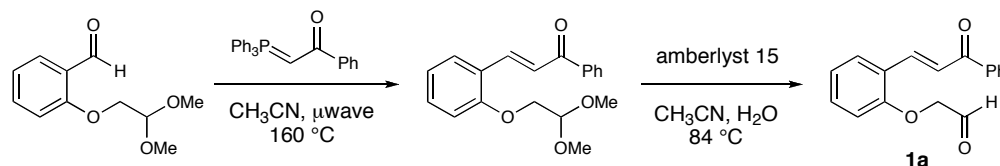

To an oven dried microwave vial was added the acetal (210 mg, 1.0 mmol), (benzoylmethylene)triphenylphosphorane (592 mg, 1.5 mmol), and CH<sub>3</sub>CN (2 mL, 0.5 M). The

- Pangborn, A. B.; Giardello, M. A.; Grubbs, R. H.; Rosen, R. K.; Timmers, F. J. *Organometal.* **1996**, *15*, 1518-1520.
- Perrin, D. D. and Armarego, W. L. *Purification of Laboratory Chemicals*; 3rd Ed., Pergamon Press, Oxford. 1988.

vial was purged with N<sub>2</sub>, capped, and heated to 160 °C under microwave irradiation for 45 min with 20 s prestirring, normal absorption. The reaction mixture was concentrated *in vacuo* and purified by flash column chromatography on silica gel with 20% EtOAc in hexanes as an eluent to afford 319 mg (98% yield) of the enone as a yellow oil. Subsequently, to a 25 mL round bottom flask containing the enone (312 mg, 1 mmol) was added CH<sub>3</sub>CN (10 mL, 0.1 M), H<sub>2</sub>O<sup>3</sup> (2 mL), and amberlyst 15 resin (100 mg). The flask was then placed in an oil bath and heated to 84 °C for 24 hr. The reaction was cooled to 23 °C and diluted with 20 mL of CH<sub>2</sub>Cl<sub>2</sub>. The mixture was then washed with brine, dried over Na<sub>2</sub>SO<sub>4</sub>, filtered, and concentrated *in vacuo*. The mixture was purified by flash column chromatography on silica gel with 30% EtOAc in hexanes to 50% EtOAc in hexanes as an eluent to afford 215 mg (81% yield) of aldehyde **1a** as a viscous yellow oil.<sup>4</sup>

### General Procedure for the Synthesis of 3,4-Dihydrocoumarins

To a flame-dried 25 mL round bottom flask equipped with a magnetic stirring bar, gas inlet tube, and septum was added the aldehyde (0.2 mmol) and CH<sub>3</sub>CN (9 mL, 0.022 M). Then, a mixture containing azolium salt **C** (6 mg, 0.02 mmol), DBU (3 μL, 0.02 mmol), and 1 mL CH<sub>3</sub>CN was added dropwise over 10 min via syringe. Upon consumption of the aldehyde (all reactions were completed within 12 hr), to the reaction was added 5 mL aqueous sat. NH<sub>4</sub>Cl and 20 mL CH<sub>2</sub>Cl<sub>2</sub>. The layers were then separated. The aqueous layer was washed with CH<sub>2</sub>Cl<sub>2</sub> (2 x 10 mL). The combined organics were dried over Na<sub>2</sub>SO<sub>4</sub>, filtered, and concentrated *in vacuo*. The crude mixture was then purified by flash column chromatography on silica gel (5 g SiO<sub>2</sub>) with 10% EtOAc in hexanes to 100% EtOAc as eluent to afford the corresponding 3,4-dihydrocoumarin.

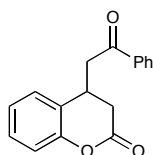

**4-(2-oxo-2-phenylethyl)chroman-2-one (2a):** Prepared according to general procedure using (*E*)-2-(2-(3-oxo-3-phenylprop-1-enyl)phenoxy)acetaldehyde (53 mg, 0.2 mmol) to afford 44 mg (83%) of **2a** as a yellow oil after 3 hr. Analytical data for **2a**: IR (film) 3063, 2918, 1769, 1683, 1593, 1453 cm<sup>-1</sup>; <sup>1</sup>H NMR (500 MHz, CDCl<sub>3</sub>) δ 7.92 (d, *J* = 8.1 Hz, 2H), 7.59 (t, *J* = 7.3 Hz, 1H), 7.47 (t, *J* = 7.8 Hz, 2H), 7.32 (d, *J* = 7.9 Hz, 1H), 7.29 (d, *J* = 8.2 Hz, 1H), 7.14 (d, *J* = 7.5 Hz, 1H), 7.10 (d, *J* = 8.4 Hz, 1H), 3.91-3.89 (m, 1H), 3.33 (dd, *J* = 6.2, 17.7 Hz, 1H), 3.26 (dd, *J* = 6.7, 17.7 Hz, 1H), 2.96 (dd, *J* = 5.9, 16.3 Hz, 1H), 2.90 (dd, *J* = 3.9, 16.1 Hz, 1H); <sup>13</sup>C NMR (125 MHz, CDCl<sub>3</sub>) δ 197.1, 168.3, 151.7, 136.6, 133.8, 129.0, 128.9, 128.3, 128.2, 126.1, 125.0, 117.5, 43.2, 35.0, 30.7; LRMS (ES): Mass calcd for C<sub>17</sub>H<sub>14</sub>O<sub>3</sub> [M+Na]<sup>+</sup>, 289. Found [M+Na]<sup>+</sup>, 289.

3. The synthesis of compound **8** required a 9:1 mixture of CH<sub>3</sub>CN:H<sub>2</sub>O<sup>18</sup>.
4. All aldehydes were stored in benzene at -30 °C.

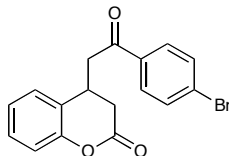

**4-(2-(4-bromophenyl)-oxoethyl)chroman-2-one (2b):** Prepared according to general procedure using (*E*)-2-(2-(3-(4-bromophenyl)-3-oxoprop-1-enyl)phenoxy)acetaldehyde (69 mg, 0.2 mmol) to afford 53 mg (77%) of **2b** as a light tan solid after 3 hr. Analytical data for **2b**: IR (film) 3063, 2918, 1751, 1674, 1566, 1484  $\text{cm}^{-1}$ ;  $^1\text{H}$  NMR (500 MHz,  $\text{CDCl}_3$ )  $\delta$  7.77 (d,  $J = 8.2$  Hz, 2H), 7.60 (d,  $J = 8.2$  Hz, 2H), 7.31-7.27 (m, 2H), 7.14-7.09 (m, 2H), 3.88-3.86 (m, 1H), 3.27 (dd,  $J = 6.2, 17.7$  Hz, 1H), 3.21 (dd,  $J = 7.5, 17.8$ , 1H), 2.95 (dd,  $J = 5.9, 16.3$  Hz, 1H), 2.89 (dd,  $J = 3.3, 16.1$  Hz, 1H);  $^{13}\text{C}$  NMR (125 MHz,  $\text{CDCl}_3$ )  $\delta$  196.2, 168.2, 151.7, 135.3, 132.3, 129.8, 129.12, 129.10, 128.2, 125.9, 125.0, 117.5, 43.1, 34.9, 30.7; LRMS (ES): Mass calcd for  $\text{C}_{17}\text{H}_{13}\text{BrO}_3$   $[\text{M}+\text{H}]^+$ , 345. Found  $[\text{M}+\text{H}]^+$ , 345.

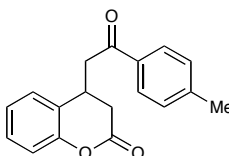

**4-(2-oxo-2-p-tolylethyl)chroman-2-one (2c):** Prepared according to general procedure using (*E*)-2-(2-(3-oxo-3-*p*-tolylprop-1-enyl)phenoxy)acetaldehyde (56 mg, 0.2 mmol) to afford 47 mg (84%) of **2c** as a light yellow oil after 12 hr. Analytical data for **2c**: IR (film) 3060, 2917, 1769, 1678, 1604, 1452  $\text{cm}^{-1}$ ;  $^1\text{H}$  NMR (500 MHz,  $\text{CDCl}_3$ )  $\delta$  7.81 (d,  $J = 8.3$  Hz, 2H), 7.32-7.25 (m, 4H), 7.13 (d,  $J = 7.8$  Hz, 1H), 7.09 (d,  $J = 8.3$  Hz, 1H), 3.91-3.86 (m, 1H), 3.28 (dd,  $J = 5.8, 17.8$ , 1H), 3.23 (dd,  $J = 7.8, 17.6$  Hz, 1H), 2.95 (dd,  $J = 5.9, 16.1$  Hz, 1H), 2.88 (dd,  $J = 3.9, 16.1$  Hz, 1H), 2.42 (s, 3H);  $^{13}\text{C}$  NMR (125 MHz,  $\text{CDCl}_3$ )  $\delta$  196.7, 168.3, 151.7, 144.8, 134.2, 129.7, 128.9, 128.4, 128.2, 126.2, 125.0, 117.4, 43.0, 35.0, 30.8, 21.9; LRMS (ES): Mass calcd for  $\text{C}_{18}\text{H}_{16}\text{O}_3$   $[\text{M}+\text{Na}]^+$ , 303. Found  $[\text{M}+\text{Na}]^+$ , 303.

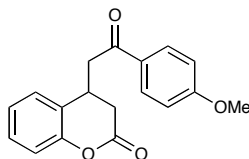

**4-(2-(4-methoxyphenyl)-oxoethyl)chroman-2-one (2d):** Prepared according to general procedure using (*E*)-2-(2-(3-(4-methoxyphenyl)-3-oxophenylprop-1-enyl)phenoxy)acetaldehyde (60 mg, 0.2 mmol) to afford 48 mg (80%) of **2d** as a yellow oil after 6 hr. Analytical data for **2d**: IR (film) 3067, 2918, 1767, 1675, 1511, 1458  $\text{cm}^{-1}$ ;  $^1\text{H}$  NMR (500 MHz,  $\text{CDCl}_3$ )  $\delta$  7.89 (d,  $J = 8.8$  Hz, 2H), 7.31-7.26 (m, 2H), 7.13-7.08 (m, 2H), 6.96 (d,  $J = 8.8$  Hz, 2H), 3.90-3.86 (m, 4H), 3.25 (dd,  $J = 6.3, 17.6$  Hz, 1H), 3.19 (dd,  $J = 8.3, 18.1$  Hz, 1H), 2.94 (dd,  $J = 5.9, 16.1$  Hz, 1H), 2.88 (dd,  $J = 3.9, 16.2$  Hz, 1H);  $^{13}\text{C}$  NMR (125 MHz,  $\text{CDCl}_3$ )  $\delta$  195.6, 168.3, 164.1, 151.7, 130.6, 129.8, 128.9, 128.2, 126.3, 124.8, 117.4, 114.1, 55.8, 42.8, 35.0, 30.8; LRMS (ES): Mass calcd for  $\text{C}_{18}\text{H}_{16}\text{O}_4$   $[\text{M}+\text{Na}]^+$ , 319. Found  $[\text{M}+\text{Na}]^+$ , 319.

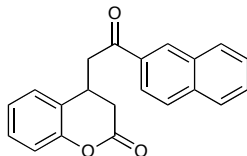

**4-(2-(naphthalen-2-yl)-2-oxyethyl)chroman-2-one (2e):** Prepared according to general procedure using (*E*)-2-(2-(3-(naphthalen-2-yl)-3-oxoprop-1-enyl)phenoxy)acetaldehyde (63 mg, 0.2 mmol) to afford 57 mg (90%) of **2e** as a yellow solid after 6 hr. Analytical data for **2e**: IR (film) 3062, 2918, 2852, 1767, 1679, 1459  $\text{cm}^{-1}$ ;  $^1\text{H}$  NMR (500 MHz,  $\text{CDCl}_3$ )  $\delta$  8.39 (s, 1H), 7.99 (d,  $J = 8.8$  Hz, 1H), 7.92 (d,  $J = 8.3$  Hz, 1H), 7.89-7.86 (m, 2H), 7.61 (m, 1H), 7.55 (t,  $J = 7.4$  Hz, 1H), 7.34 (d,  $J = 7.8$  Hz, 1H), 7.30-7.26 (m, 1H), 7.12 (t,  $J = 7.3$  Hz, 1H), 7.10 (d,  $J = 7.8$  Hz, 1H), 3.96-3.91 (m, 1H), 3.45 (dd,  $J = 6.4, 17.6$  Hz, 1H), 3.38 (dd,  $J = 7.8, 17.6$  Hz, 1H), 2.98 (dd,  $J = 5.9, 16.1$  Hz, 1H), 2.93 (dd,  $J = 4.4, 16.1$  Hz, 1H);  $^{13}\text{C}$  NMR (125 MHz,  $\text{CDCl}_3$ )  $\delta$  197.0, 168.3, 151.8, 136.0, 133.9, 132.7, 130.2, 129.9, 129.1, 129.0, 128.9, 128.3, 128.0, 127.2, 126.2, 125.0, 123.8, 117.5, 43.2, 35.1, 30.9; LRMS (ES): Mass calcd for  $\text{C}_{21}\text{H}_{16}\text{O}_3$   $[\text{M}+\text{Na}]^+$ , 339. Found  $[\text{M}+\text{Na}]^+$ , 339.

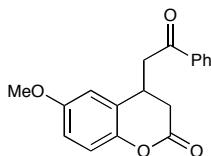

**6-methoxy-4-(2-oxo-2-phenylethyl)chroman-2-one (2f):** Prepared according to general procedure using (*E*)-2-(4-methoxy-2-(3-oxo-3-phenylprop-1-enyl)phenoxy)acetaldehyde (60 mg, 0.2 mmol) to afford 41 mg (68%) of **2f** as a yellow solid after 2.5 hr. Analytical data for **2f**: IR (film) 3050, 2916, 1765, 1686, 1493  $\text{cm}^{-1}$ ;  $^1\text{H}$  NMR (500 MHz,  $\text{CDCl}_3$ )  $\delta$  7.90 (d,  $J = 7.3$  Hz, 2H), 7.57 (t,  $J = 7.3$  Hz, 1H), 7.45 (t,  $J = 7.8$  Hz, 2H), 7.00 (d,  $J = 8.8$  Hz, 1H), 6.82-6.80 (m, 1H), 6.80-7.78 (m, 1H), 3.84-3.80 (m, 1H), 3.78 (s, 3H), 3.29 (dd,  $J = 5.9, 18.1$  Hz, 1H), 3.23 (dd,  $J = 7.8, 17.6$  Hz, 1H), 2.91 (dd,  $J = 5.9, 16.1$  Hz, 1H), 2.85 (dd,  $J = 3.9, 16.1$  Hz, 1H);  $^{13}\text{C}$  NMR (125 MHz,  $\text{CDCl}_3$ )  $\delta$  197.1, 168.5, 156.6, 145.6, 136.6, 133.9, 129.0, 128.8, 127.0, 118.2, 114.1, 113.1, 56.0, 43.1, 34.9, 31.0; LRMS (ES): Mass calcd for  $\text{C}_{18}\text{H}_{16}\text{O}_4$   $[\text{M}+\text{Na}]^+$ , 319. Found  $[\text{M}+\text{Na}]^+$ , 319.

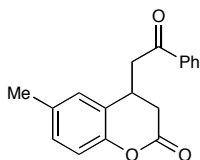

**6-methyl-4-(2-oxo-2-phenylethyl)chroman-2-one (2g):** Prepared according to general procedure using (*E*)-2-(4-methyl-2-(3-oxo-3-phenylprop-1-enyl)phenoxy)acetaldehyde (56 mg, 0.2 mmol) to afford 45 mg (80%) of **2g** as a yellow oil after 2 hr. Analytical data for **2g**: IR (film) 3061, 2918, 1766, 1682, 1594, 1491  $\text{cm}^{-1}$ ;  $^1\text{H}$  NMR (500 MHz,  $\text{CDCl}_3$ )  $\delta$  7.90 (d,  $J = 7.3$  Hz, 2H), 7.57 (t,  $J = 7.3$  Hz, 1H), 7.45 (t,  $J = 7.8$  Hz, 2H), 7.09-7.06 (m, 2H), 6.96 (d,  $J = 8.3$  Hz, 1H), 3.84-3.79 (m, 1H), 3.29 (dd,  $J = 5.8, 17.5$  Hz, 1H), 3.22 (dd,  $J = 7.8, 18.1$  Hz, 1H), 2.91 (dd,  $J = 5.9, 16.1$  Hz, 1H), 2.86 (dd,  $J = 3.9, 16.1$  Hz, 1H), 2.32 (s, 3H);  $^{13}\text{C}$  NMR (125 MHz,  $\text{CDCl}_3$ )  $\delta$  197.2, 168.5, 149.6, 136.7, 134.7, 133.8, 129.5, 129.0, 128.5, 128.3, 125.8, 117.2, 43.2, 35.0, 30.7, 21.0; LRMS (ES): Mass calcd for  $\text{C}_{18}\text{H}_{16}\text{O}_3$   $[\text{M}+\text{Na}]^+$ , 303. Found  $[\text{M}+\text{Na}]^+$ , 303.

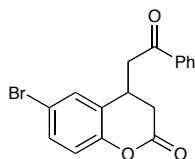

**6-bromo-4-(2-oxo-2-phenylethyl)chroman-2-one (2h):** Prepared according to general procedure using (*E*)-2-(4-bromo-2-(3-oxo-3-phenylprop-1-enyl)phenoxy)acetaldehyde (69 mg, 0.2 mmol) to afford 53 mg (77%) of **2h** as a pale yellow solid after 45 min. Analytical data for **2h**: IR (film) 3065, 2918, 2852, 1771, 1682, 1473  $\text{cm}^{-1}$ ;  $^1\text{H}$  NMR (500 MHz,  $\text{CDCl}_3$ )  $\delta$  7.91 (d,  $J = 7.3$  Hz, 2H), 7.58 (t,  $J = 7.3$  Hz, 1H), 7.47-7.42 (m, 3H), 7.39 (d,  $J = 8.8$  Hz, 1H), 6.96 (d,  $J = 8.8$  Hz, 1H), 3.87-3.82 (m, 1H), 3.30 (dd,  $J = 6.3, 18.1$  Hz, 1H), 3.24 (dd,  $J = 7.3, 18.1$  Hz, 1H), 2.92 (dd,  $J = 5.9, 16.1$  Hz, 1H), 2.87 (dd,  $J = 3.9, 16.1$  Hz, 1H);  $^{13}\text{C}$  NMR (125 MHz,  $\text{CDCl}_3$ )  $\delta$  196.6, 167.5, 150.8, 136.4, 134.0, 132.0, 131.1, 129.1, 128.3, 128.2, 119.2, 117.5, 43.0, 34.6, 30.5; LRMS (ES): Mass calcd for  $\text{C}_{17}\text{H}_{13}\text{BrO}_3$   $[\text{M}+\text{Na}]^+$ , 367. Found  $[\text{M}+\text{Na}]^+$ , 367.

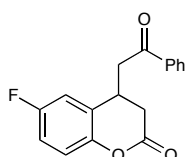

**6-fluoro-4-(2-oxo-2-phenylethyl)chroman-2-one (2i):** Prepared according to general procedure using (*E*)-2-(4-fluoro-2-(3-oxo-3-phenylprop-1-enyl)phenoxy)acetaldehyde (57 mg, 0.2 mmol) to afford 52 mg (91%) of **2i** as a yellow oil after 2 hr. Analytical data for **2i**: IR (film) 3063, 2904, 1770, 1688, 1557, 886  $\text{cm}^{-1}$ ;  $^1\text{H}$  NMR (500 MHz,  $\text{CDCl}_3$ )  $\delta$  7.91 (d,  $J = 7.3$  Hz, 2H), 7.60-7.57 (m, 1H), 7.46 (t,  $J = 7.8$  Hz, 2H), 7.06-7.03 (m, 2H), 6.96 (dt,  $J = 7.8, 7.8, 2.9$  Hz, 1H), 3.88-3.84 (m, 1H), 3.30 (dd,  $J = 6.3, 17.6$  Hz, 1H), 3.24 (dd,  $J = 7.4, 18.1$  Hz, 1H), 2.92 (dd,  $J = 5.8, 16.1$  Hz, 1H), 2.86 (dd,  $J = 3.9, 16.1$  Hz, 1H);  $^{13}\text{C}$  NMR (125 MHz,  $\text{CDCl}_3$ )  $\delta$  196.7, 167.8, 159.2 (d,  $J = 244.2$  Hz), 147.7, 136.4, 134.0, 129.0, 128.3, 127.7 (d,  $J = 7.4$  Hz), 118.7 (d,  $J = 8.6$  Hz), 115.7 (d,  $J = 23.5$  Hz), 114.9 (d,  $J = 23.5$  Hz), 42.9, 34.6, 30.7; LRMS (ES): Mass calcd for  $\text{C}_{17}\text{H}_{13}\text{FO}_3$   $[\text{M}+\text{Na}]^+$ , 307. Found  $[\text{M}+\text{Na}]^+$ , 307.

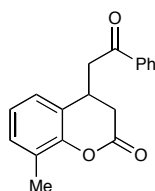

**8-methyl-4-(2-oxo-2-phenylmethyl)chroman-2-one (4):** Prepared according to general procedure using (*E*)-2-(2-methyl-6-(3-oxo-3-phenylprop-1-enyl)phenoxy)acetaldehyde (56 mg, 0.2 mmol) to afford 37 mg (66%) of **4** as a yellow solid after 6 hr. Analytical data for **4**: IR (film) 3078, 2916, 2848, 1771, 1683, 1558  $\text{cm}^{-1}$ ;  $^1\text{H}$  NMR (500 MHz,  $\text{CDCl}_3$ )  $\delta$  7.90 (d,  $J = 7.3$  Hz, 2H), 7.57 (t,  $J = 7.3$  Hz, 1H), 7.45 (t,  $J = 7.8$  Hz, 2H), 7.12 (d,  $J = 7.8$  Hz, 2H), 7.02-6.99 (m, 1H), 3.88-3.82 (m, 1H), 3.28 (dd,  $J = 5.8, 17.5$  Hz, 1H), 3.23 (dd,  $J = 7.8, 17.6$  Hz, 1H), 2.92 (dd,  $J = 5.4, 15.6$  Hz, 1H), 2.87 (dd,  $J = 3.9, 16.1$  Hz, 1H), 2.32 (s, 3H);  $^{13}\text{C}$  NMR (125 MHz,  $\text{CDCl}_3$ )  $\delta$  197.2, 168.5, 150.0, 136.7, 133.8, 130.5, 129.0, 128.3, 126.8, 125.9, 125.6, 124.9, 43.1, 35.0, 30.9, 16.0; LRMS (ES): Mass calcd for  $\text{C}_{18}\text{H}_{16}\text{O}_3$   $[\text{M}+\text{Na}]^+$ , 303. Found  $[\text{M}+\text{Na}]^+$ , 303.

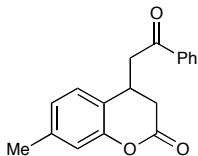

**7-methyl-4-(2-oxo-2-phenylmethyl)chroman-2-one (6):** Prepared according to general procedure using (*E*)-2-(5-methyl-2-(3-oxo-3-phenylprop-1-enyl)phenoxy)acetaldehyde (56 mg, 0.2 mmol) to afford 37 mg (66%) of **6** as a yellow solid after 6 hr. Analytical data for **6**: IR (film) 3061, 2926, 2861, 1778, 1680, 1610  $\text{cm}^{-1}$ ;  $^1\text{H}$  NMR (500 MHz,  $\text{CDCl}_3$ )  $\delta$  7.89 (d,  $J = 7.8$  Hz, 2H), 7.58-7.55 (m, 1H), 7.46-7.43 (m, 2H), 7.17 (d,  $J = 7.3$  Hz, 1H), 6.91 (d,  $J = 7.8$  Hz, 1H), 6.89 (s, 1H), 3.86-3.80 (m, 1H), 3.27 (dd,  $J = 6.4, 17.6$  Hz, 1H), 3.21 (dd,  $J = 7.8, 18.1$  Hz, 1H), 2.91 (dd,  $J = 5.9, 16.1$  Hz, 1H), 2.85 (dd,  $J = 3.9, 16.1$  Hz, 1H), 2.33 (s, 3H);  $^{13}\text{C}$  NMR (125 MHz,  $\text{CDCl}_3$ )  $\delta$  197.2, 168.5, 151.6, 139.3, 136.6, 133.8, 129.0, 128.3, 127.9, 125.7, 122.9, 117.8, 43.3, 35.1, 30.4, 21.3; LRMS (ES): Mass calcd for  $\text{C}_{18}\text{H}_{16}\text{O}_3$   $[\text{M}+\text{Na}]^+$ , 303. Found  $[\text{M}+\text{Na}]^+$ , 303.

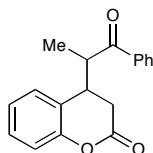

**4-(1-oxo-1-phenylpropan-2-yl)chroman-2-one (8):** Prepared according to general procedure using (*E*)-2-(2-(2-methyl-3-oxo-3-phenylprop-1-enyl)phenoxy)acetaldehyde (56 mg, 2 mmol) to afford 39 mg (70%) of **8** as a yellow oil and a mixture of diastereomers after 12 hr. Analytical data for **8**: IR (film) 3063, 2918, 2852, 1769, 1677, 1451  $\text{cm}^{-1}$ ;  $^1\text{H}$  NMR (500 MHz,  $\text{CDCl}_3$ )  $\delta$  7.95 (d,  $J = 7.5$  Hz, 2H, maj.), 7.75 (d,  $J = 7.5$  Hz, 2H, min), 7.61 (t,  $J = 7.5$  Hz, 1H, maj), 7.52-7.50 (m, 1H, min), 7.50 (d,  $J = 7.7$  Hz, 2H, maj), 7.39 (t,  $J = 7.7$  Hz, 2H, min), 7.34 (t,  $J = 7.3$  Hz, 1H, maj), 7.25 (d,  $J = 6.8$  Hz, 1H, maj), 7.19 (d,  $J = 7.7$  Hz, 1H, min), 7.17 (d,  $J = 7.2$  Hz, 1H, min), 7.16 (d,  $J = 7.1$  Hz, 1H, maj), 7.12 (d,  $J = 8.1$  Hz, 1H, maj), 7.04 (d,  $J = 8.0$  Hz, 1H, min), 6.98 (t,  $J = 7.3$  Hz, 1H, min), 3.72-3.68 (m, 1H, min), 3.64-3.59 (m, 1H, min), 3.63-3.53 (m, 2H, maj), 3.09 (dd,  $J = 2.7, 16.1$  Hz, 1H, min), 2.85 (dd,  $J = 6.0, 16.1$  Hz, 1H, min), 2.83 (dd,  $J = 3.1, 11.1$  Hz, 1H, maj), 2.79 (dd,  $J = 2.3, 16.2$  Hz, 1H, maj), 1.31 (d,  $J = 6.8$  Hz, 3H, min), 1.14 (d,  $J = 6.8$  Hz, 3H, maj);  $^{13}\text{C}$  NMR (125 MHz,  $\text{CDCl}_3$ )  $\delta$  202.9, 202.5, 168.4, 168.3, 152.0, 151.8, 136.3, 134.0, 133.6, 129.9, 129.2 (2x), 129.1, 129.0, 128.9, 128.6 (2x), 128.4, 125.4, 124.8, 124.50, 124.56, 117.6, 117.4, 44.1, 43.6, 37.9, 37.4, 34.2, 32.2, 17.7, 15.1; LRMS (ES): Mass calcd for  $\text{C}_{18}\text{H}_{16}\text{O}_3$   $[\text{M}+\text{Na}]^+$ , 303. Found  $[\text{M}+\text{Na}]^+$ , 303.

## Selected NMR Spectra

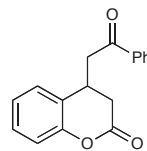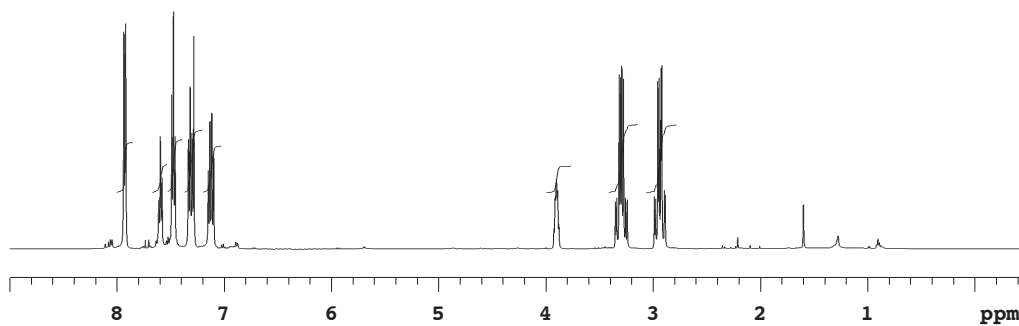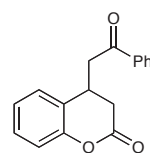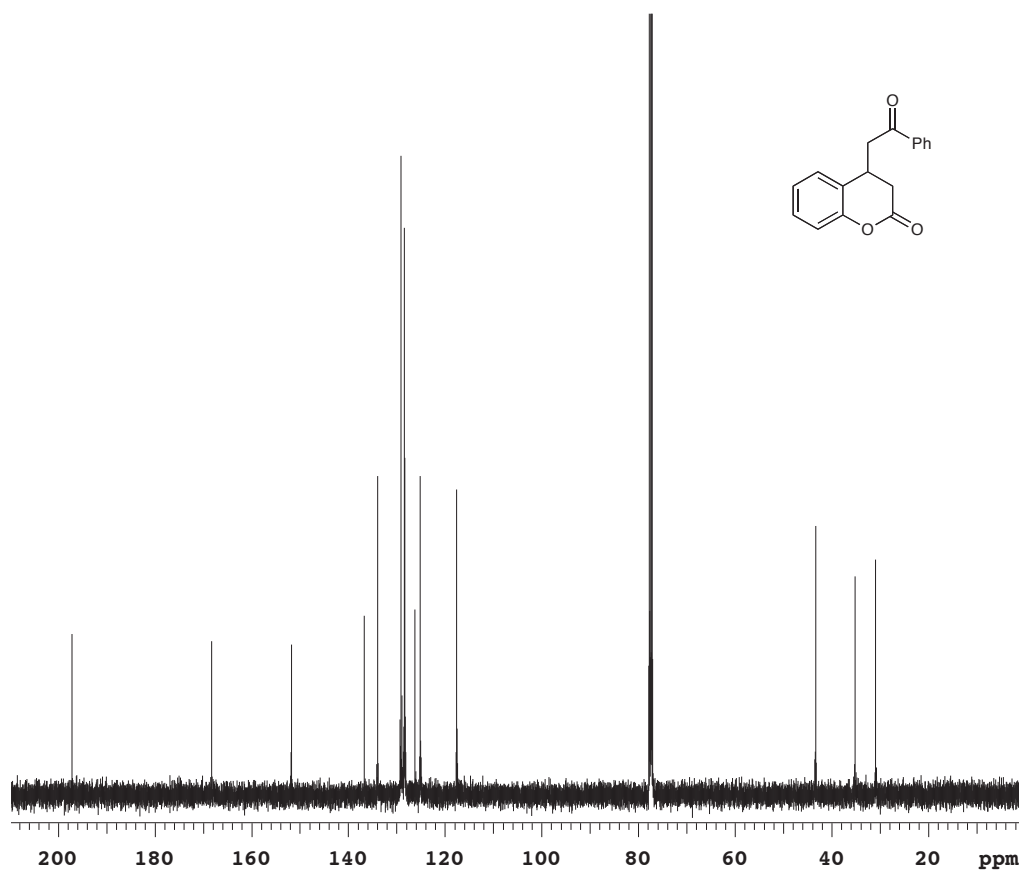



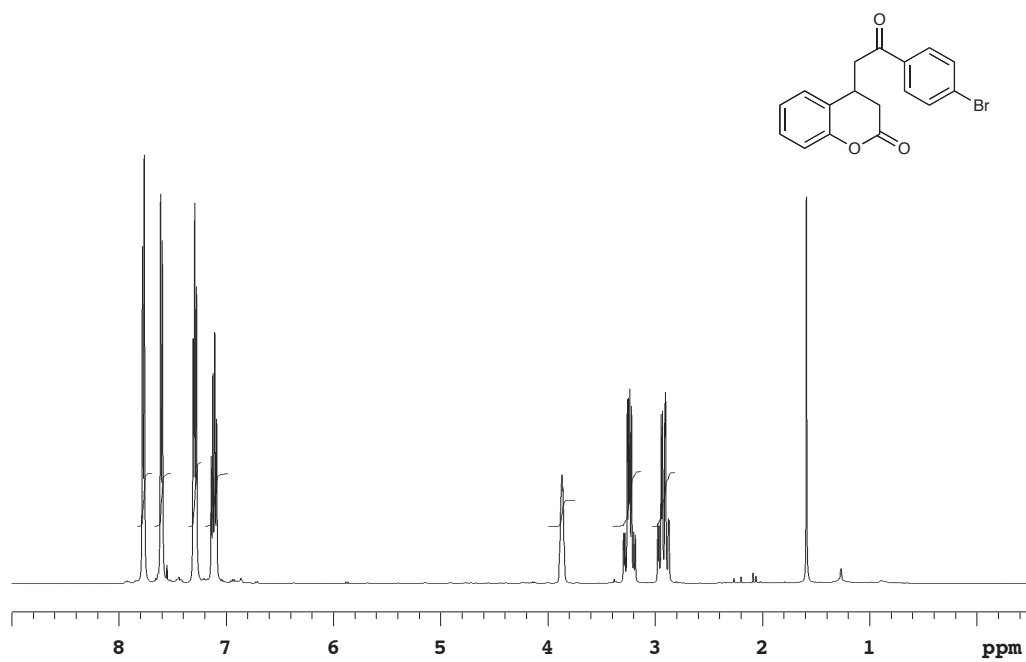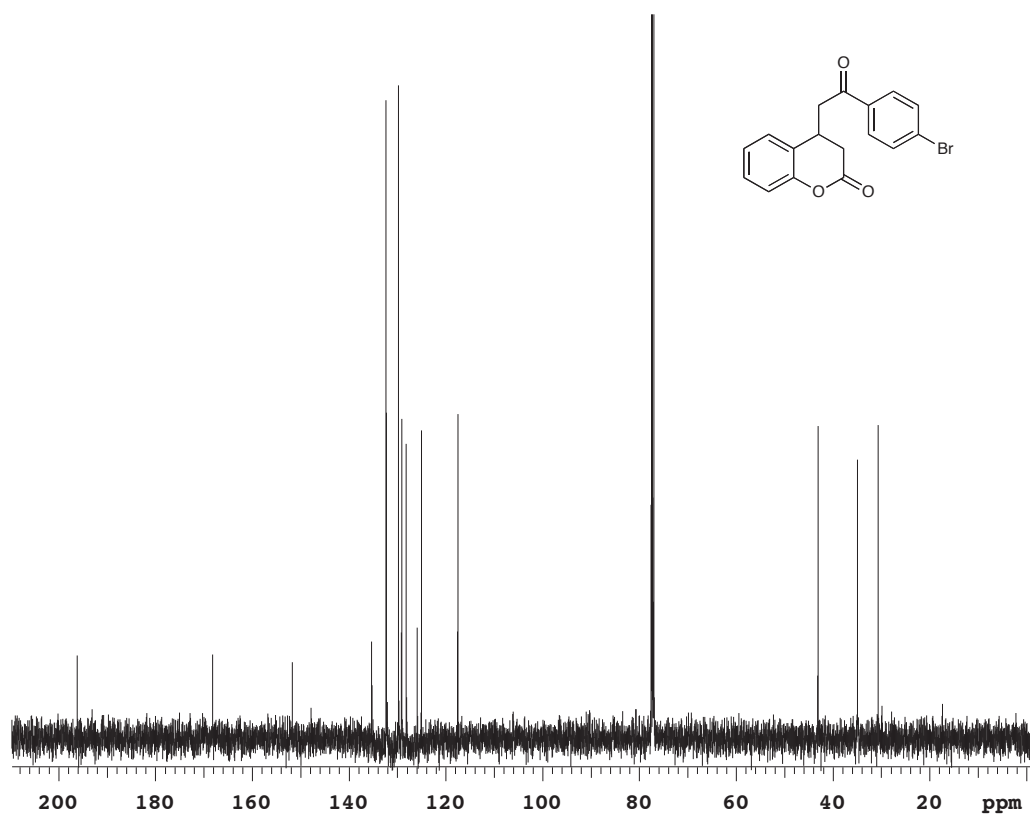

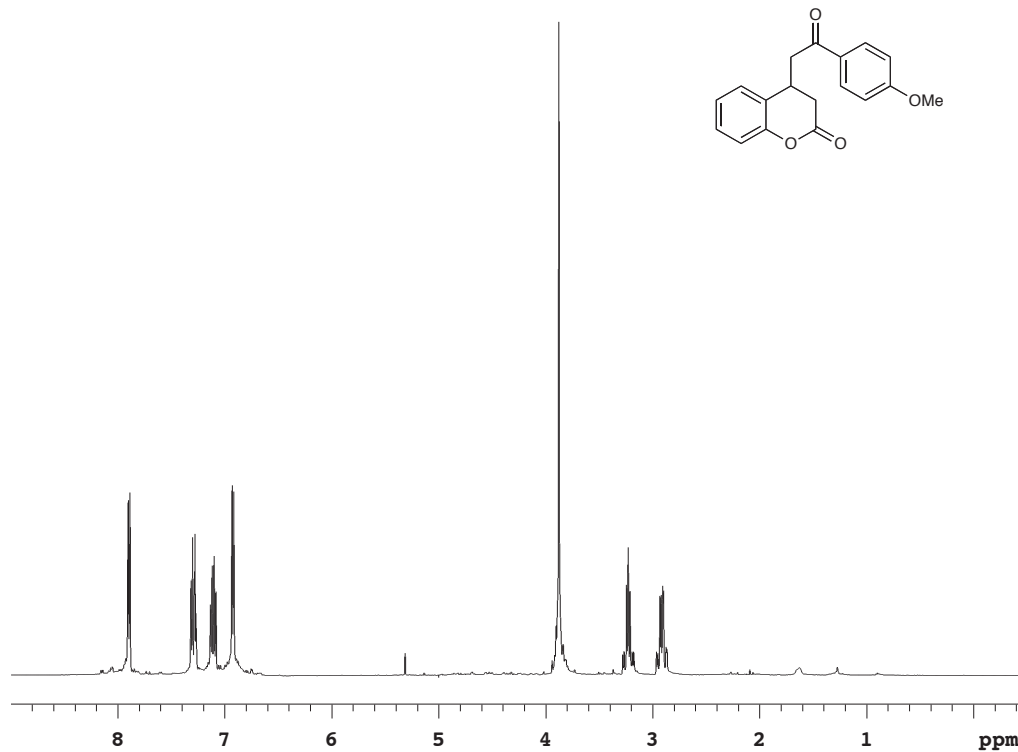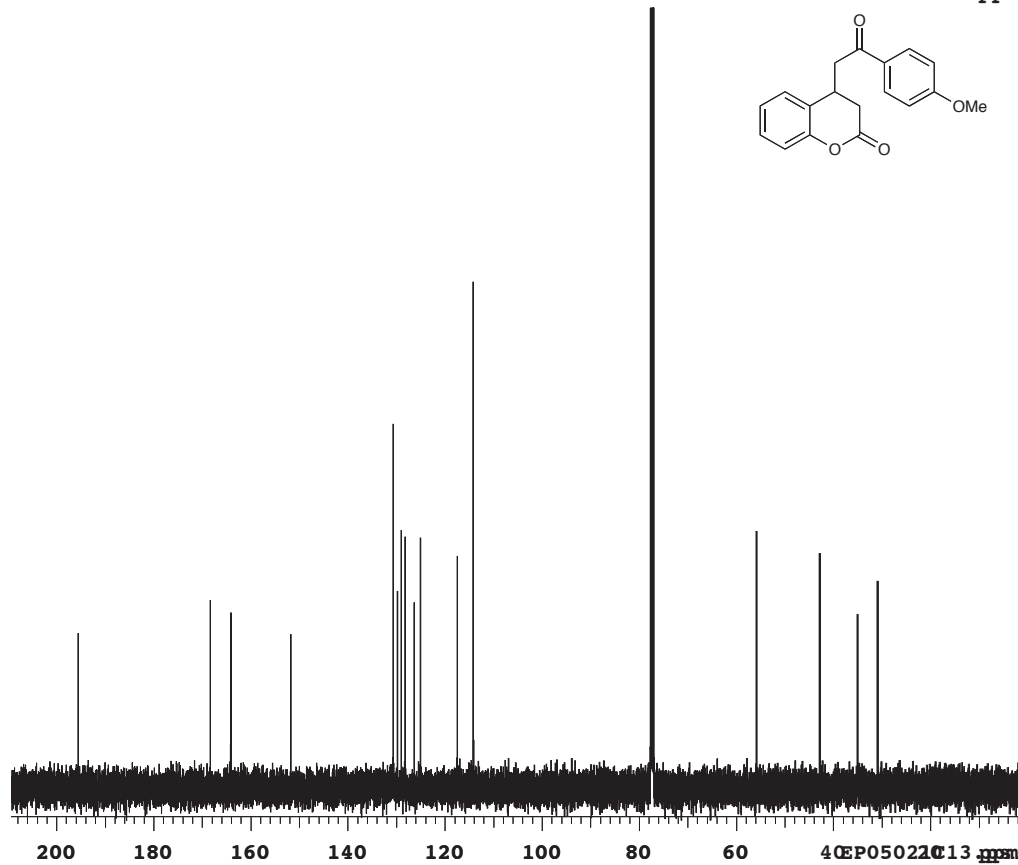

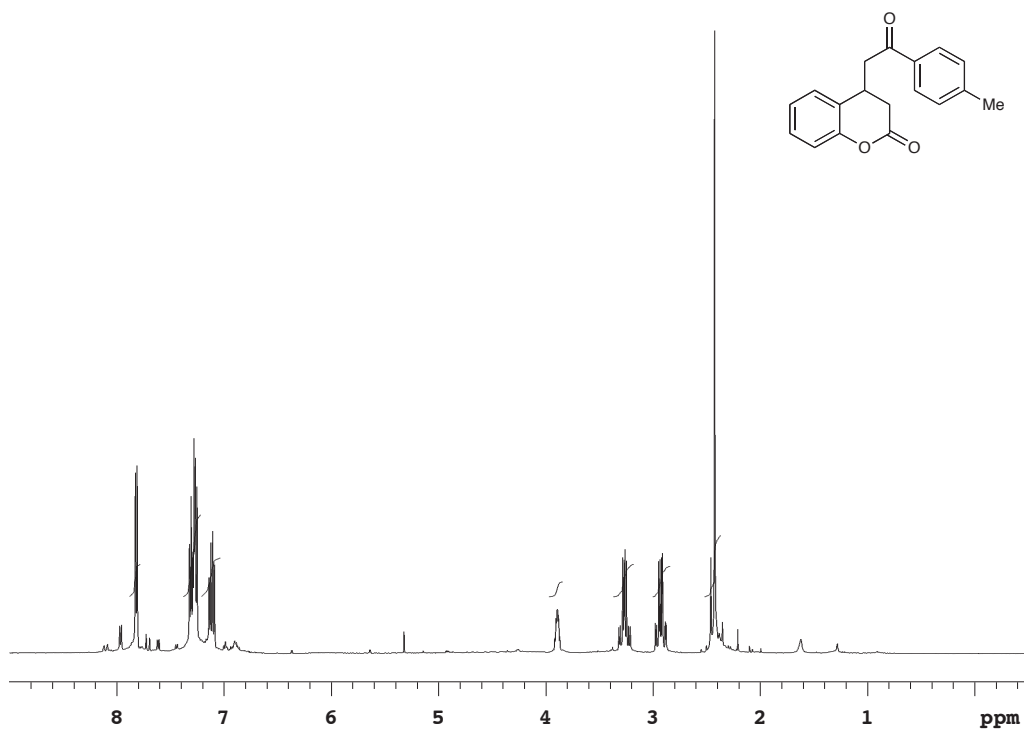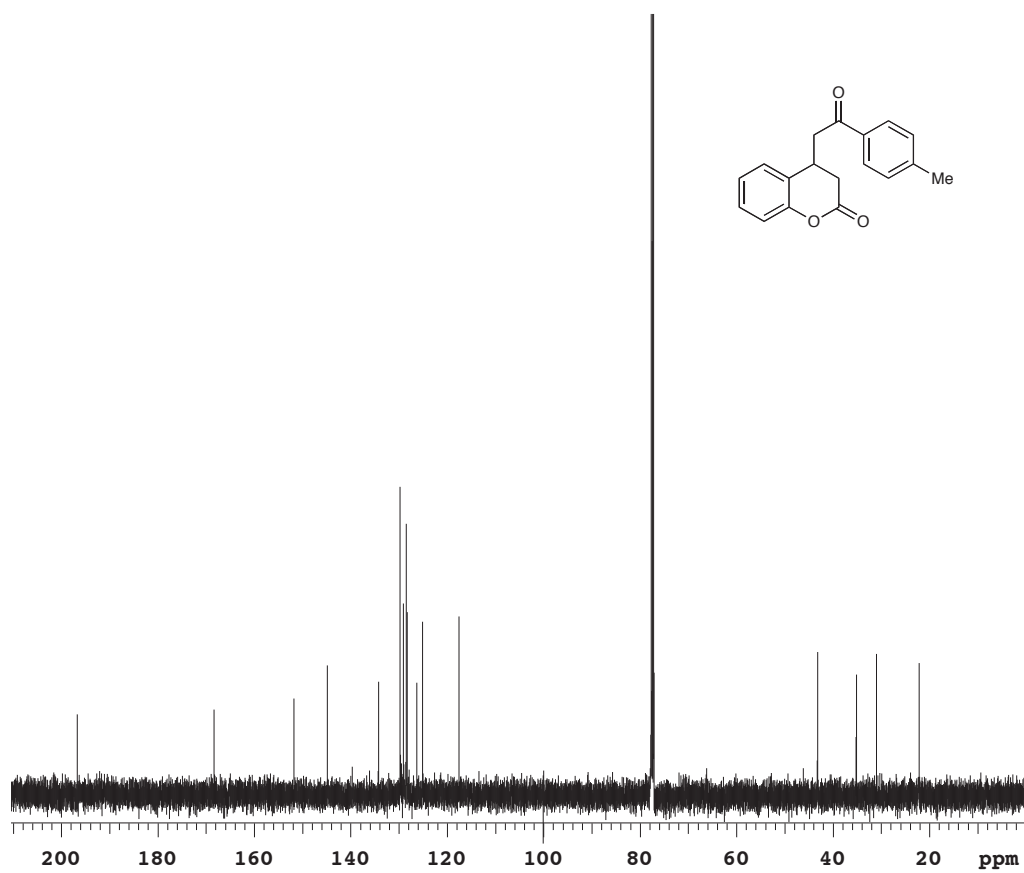

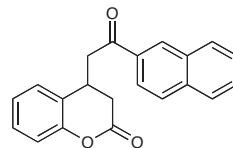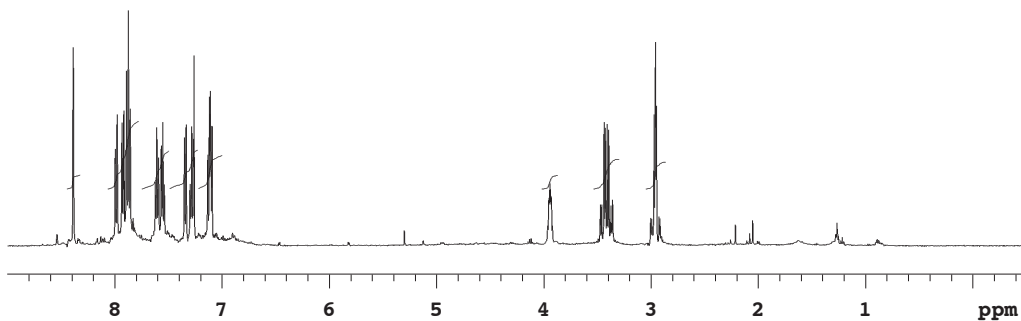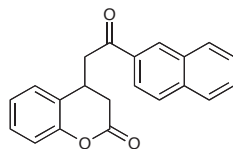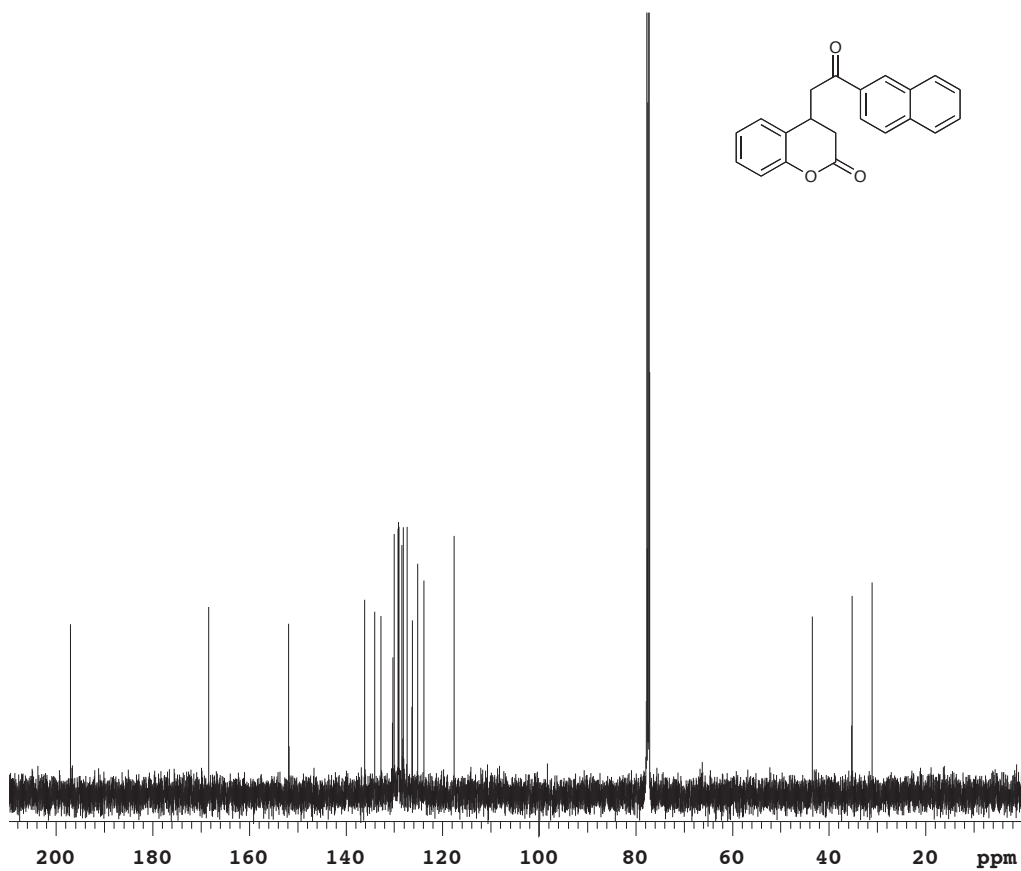

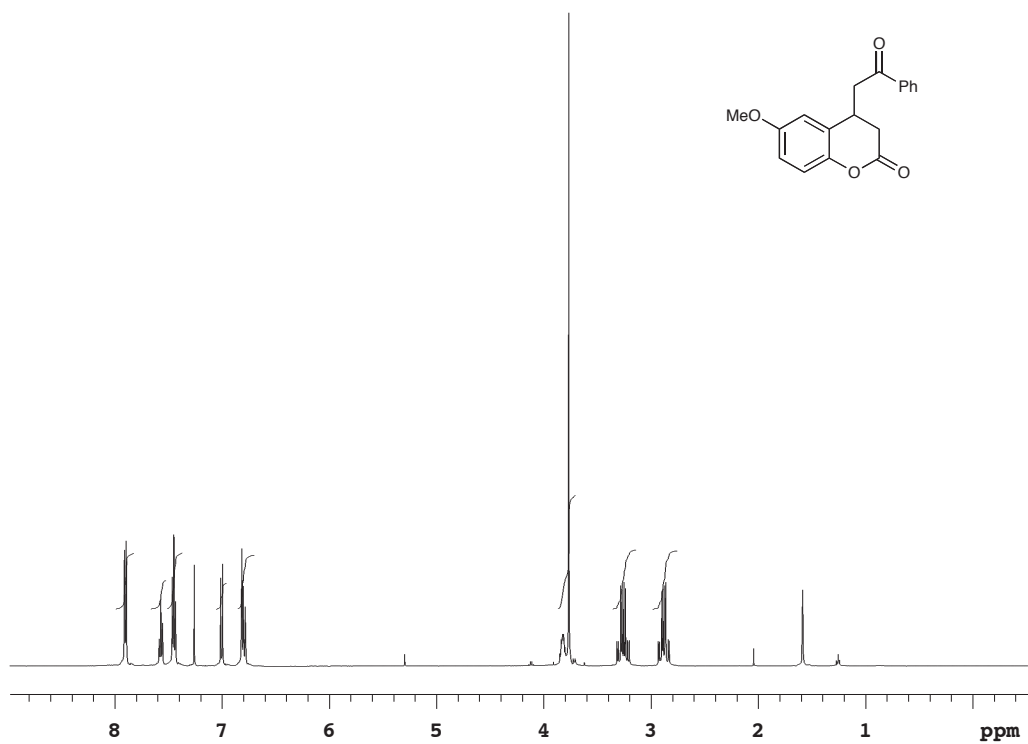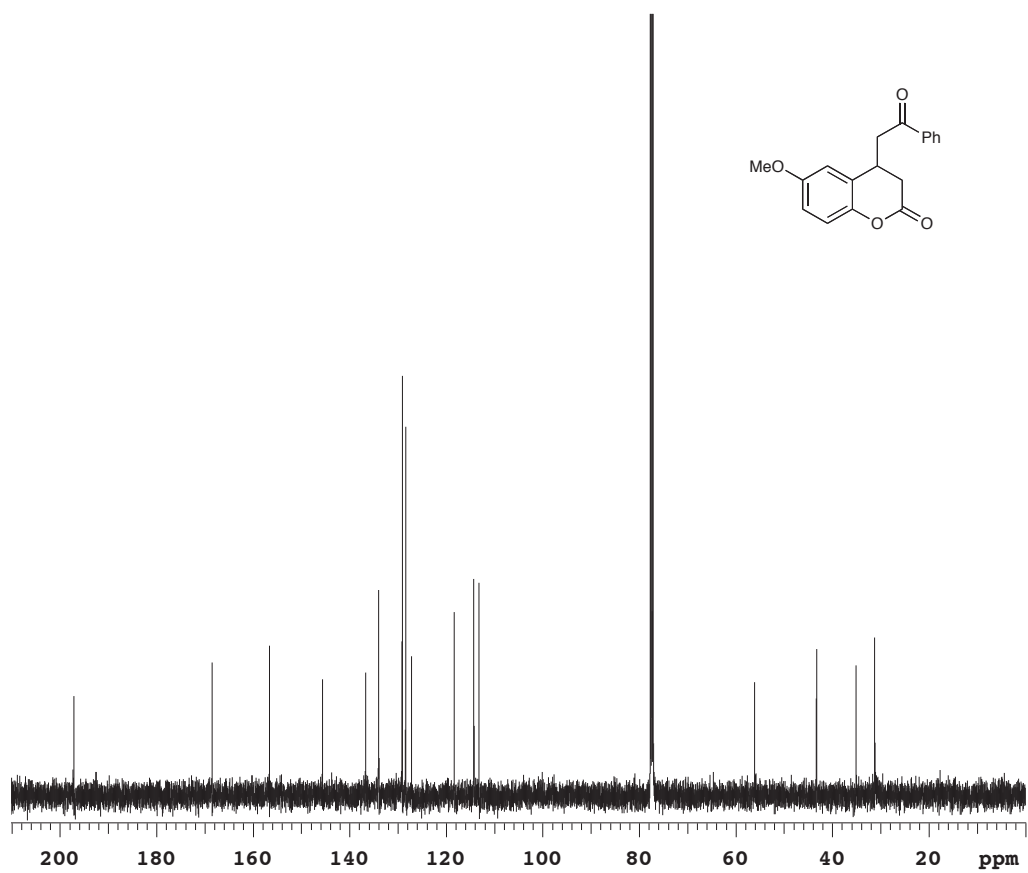

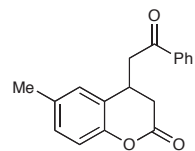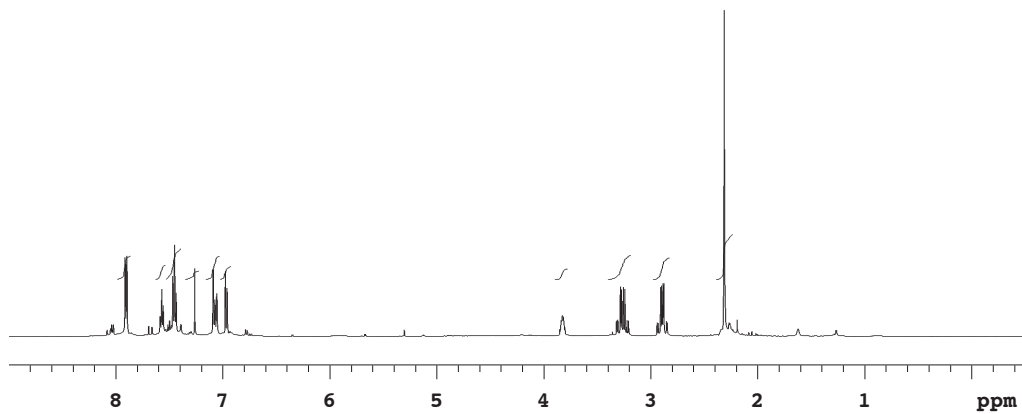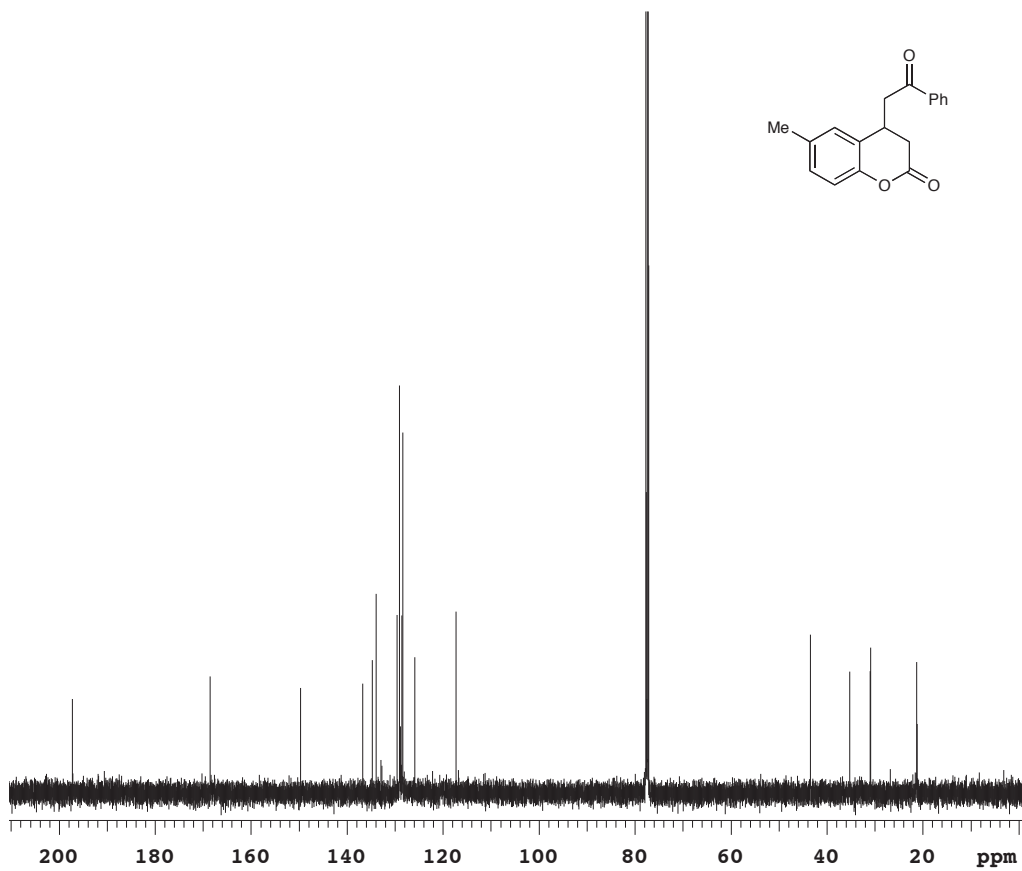

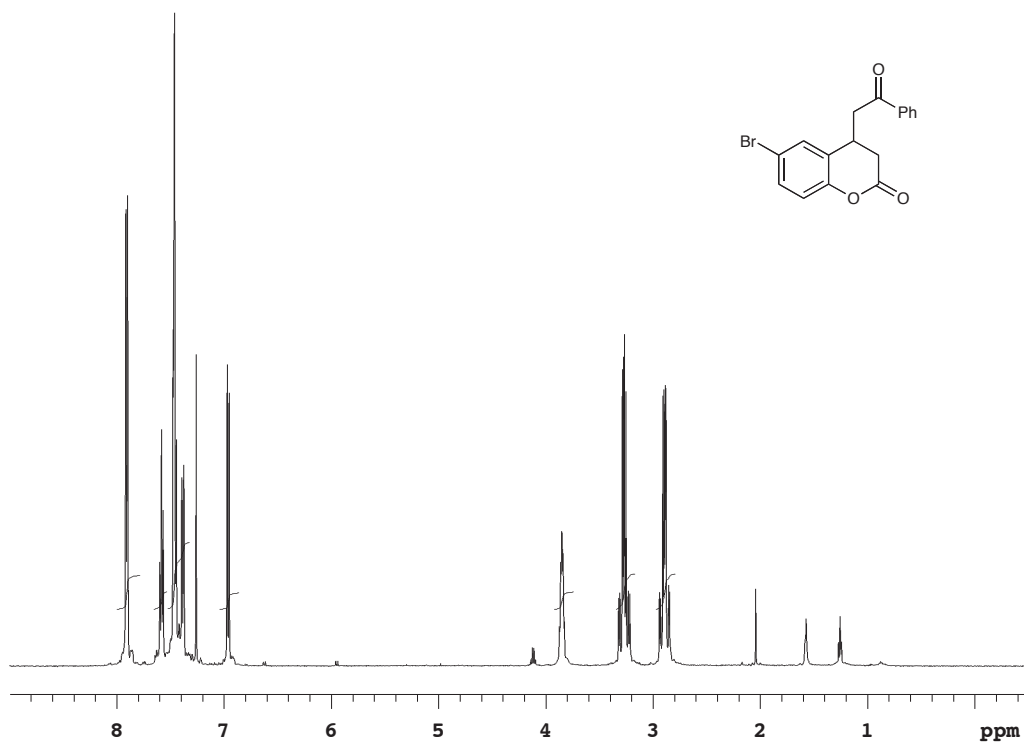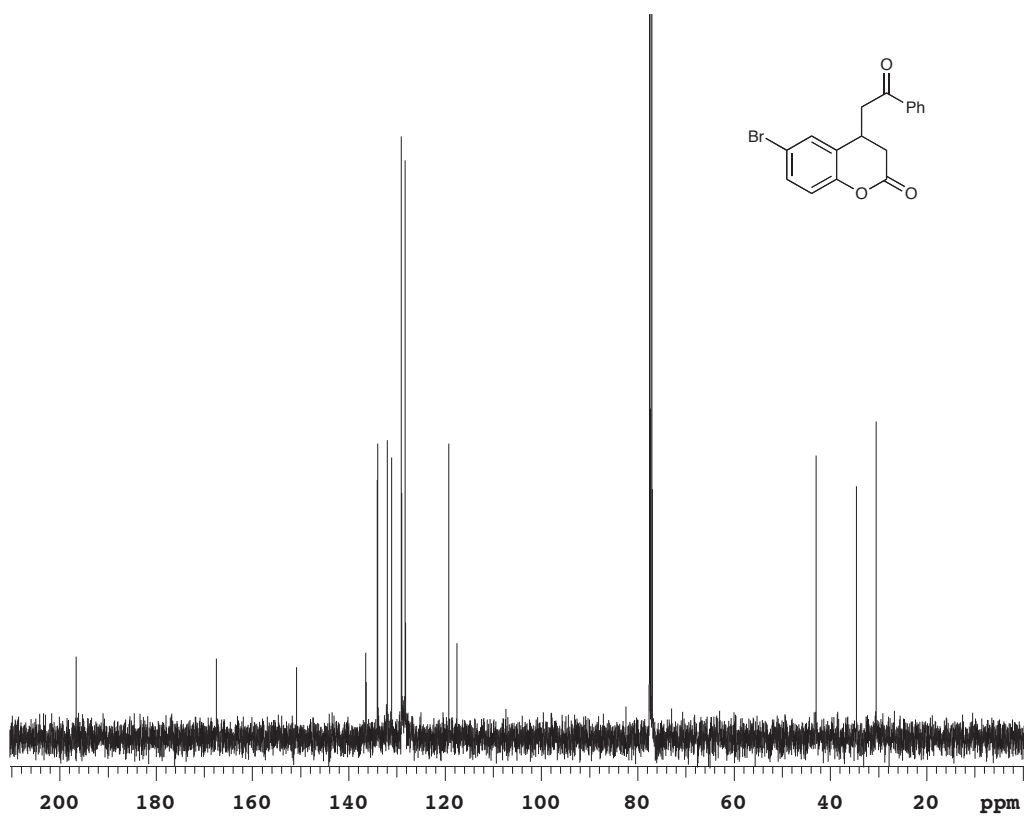

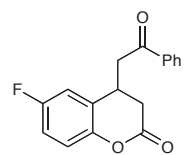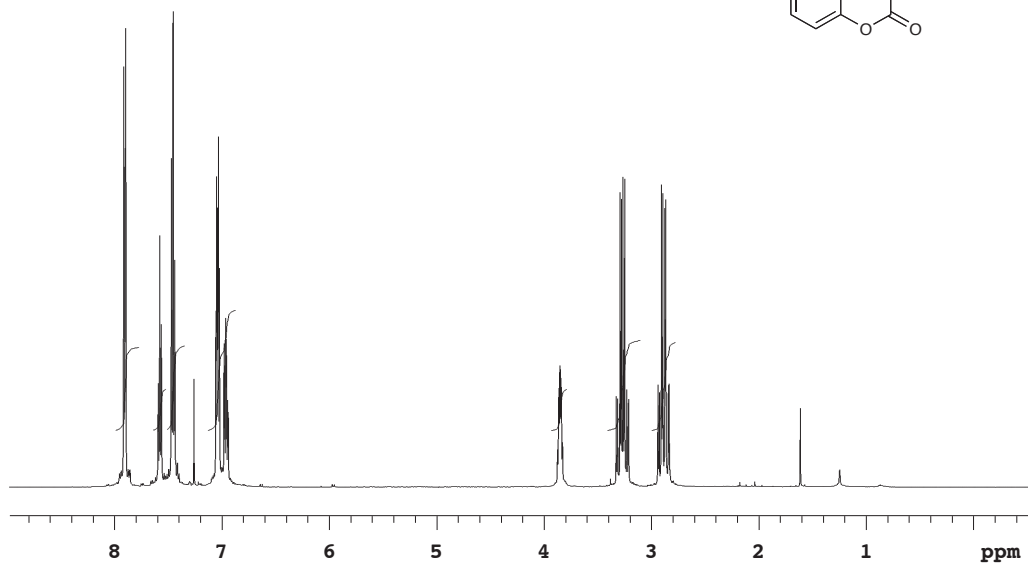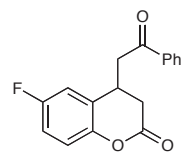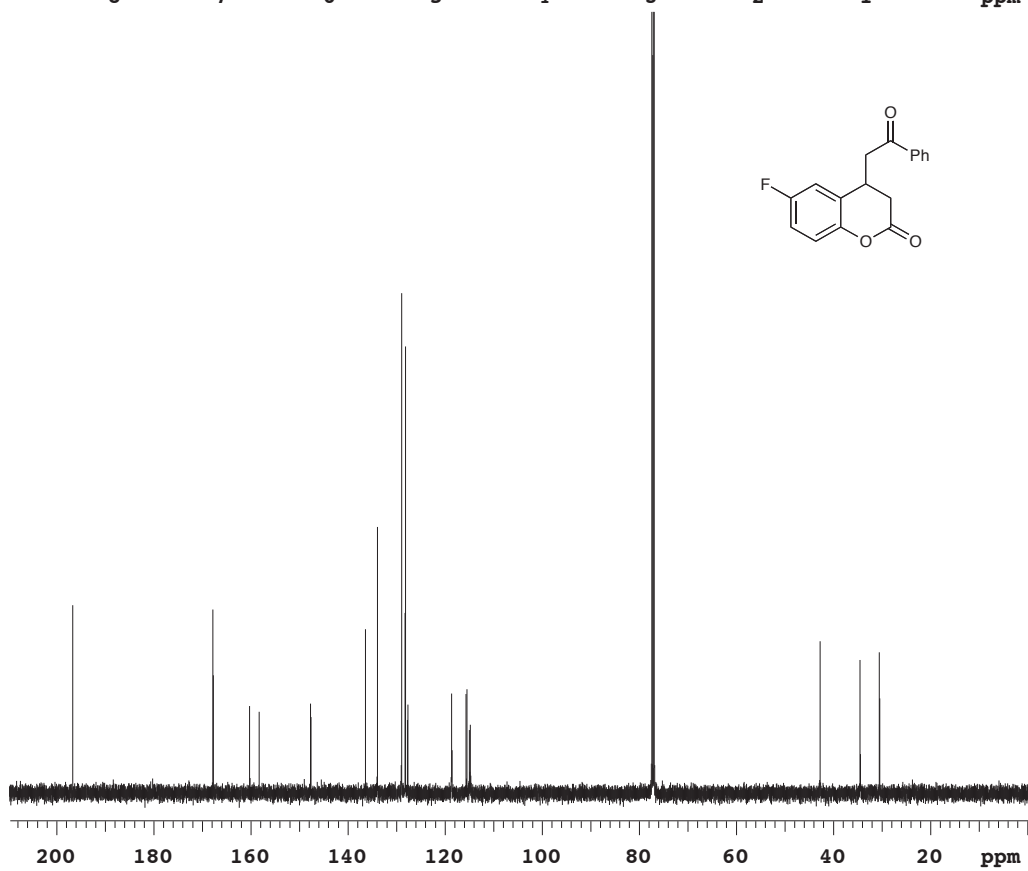



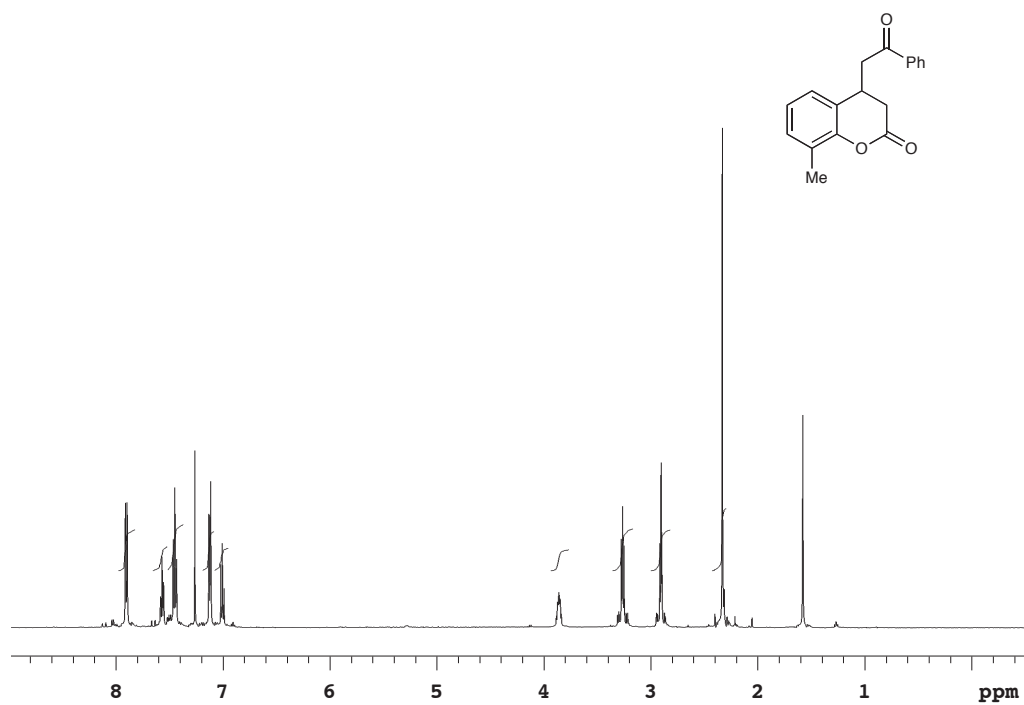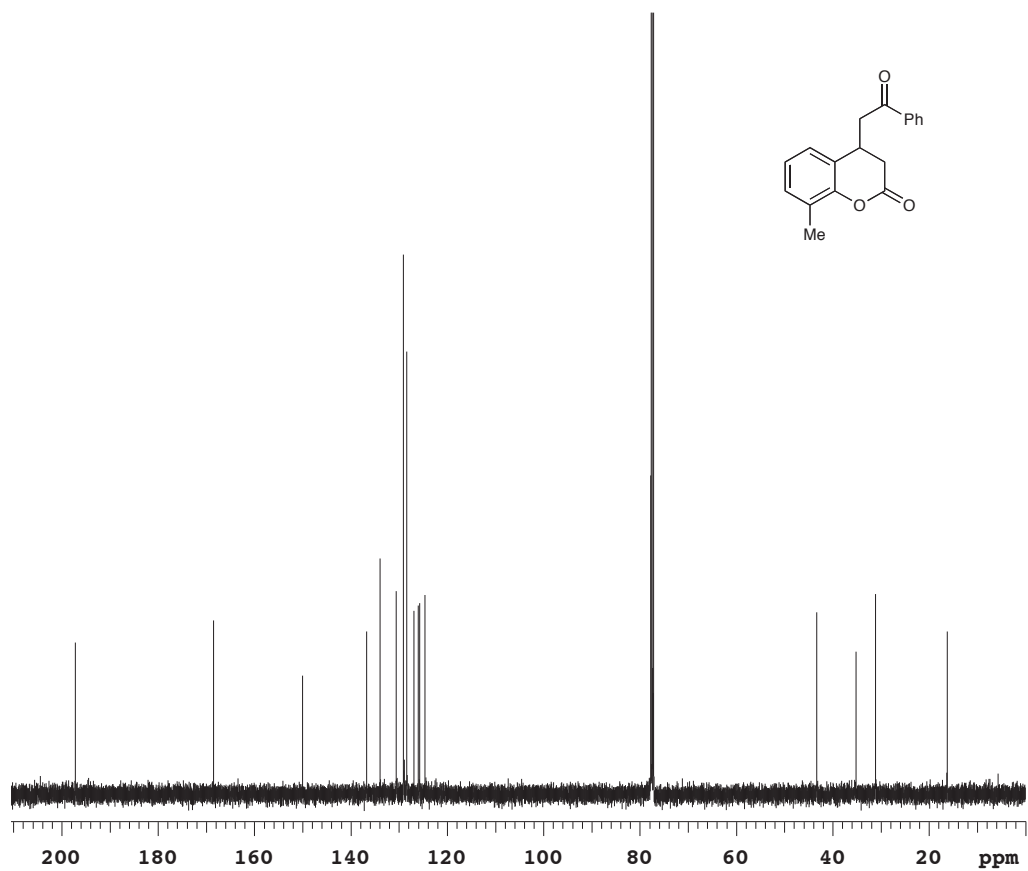

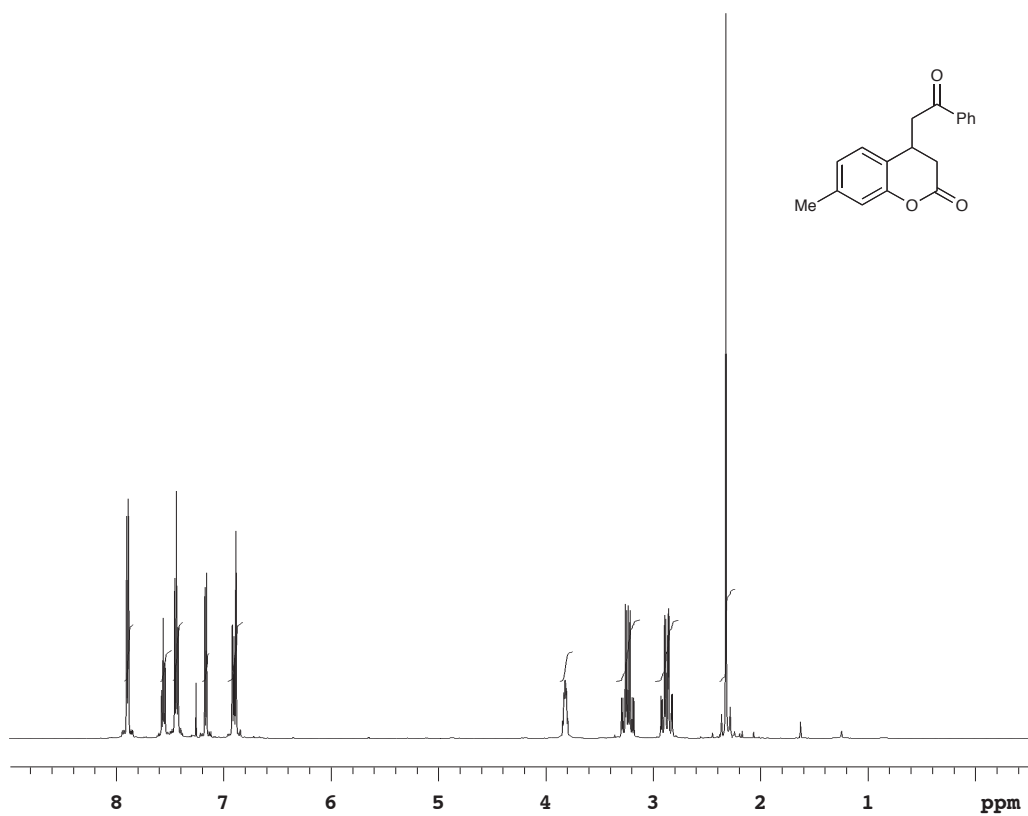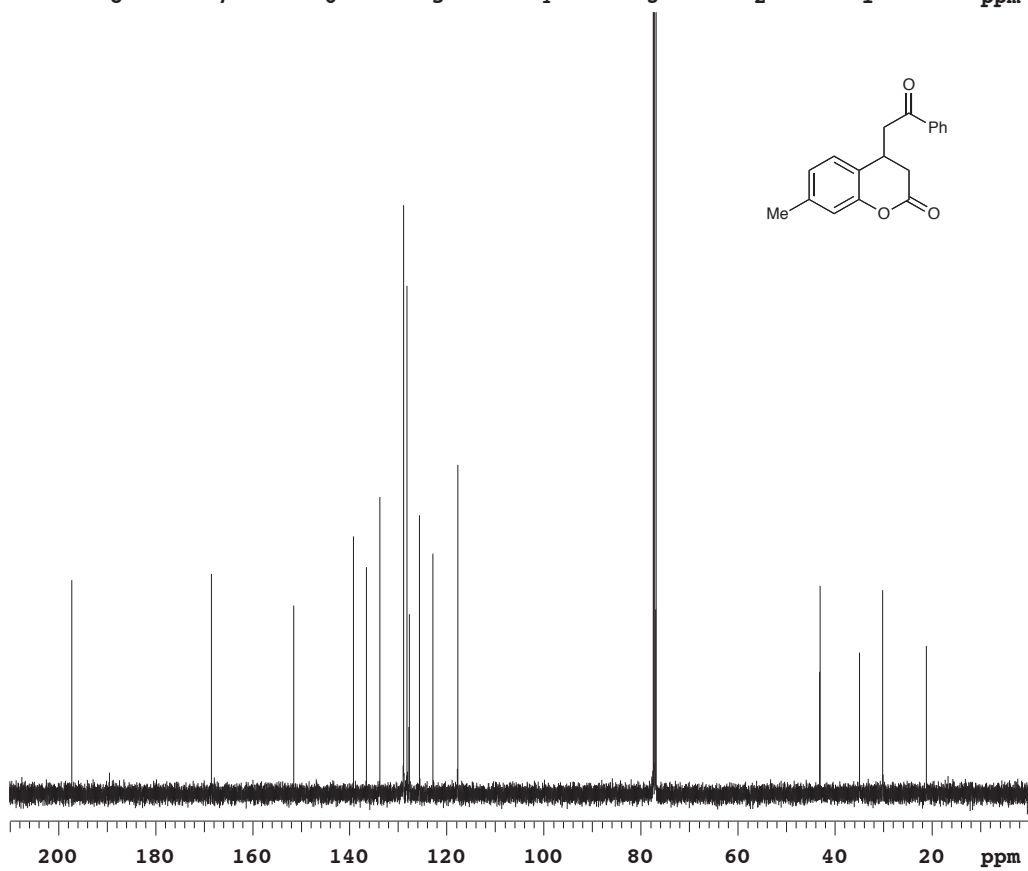

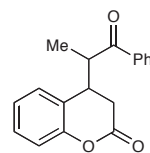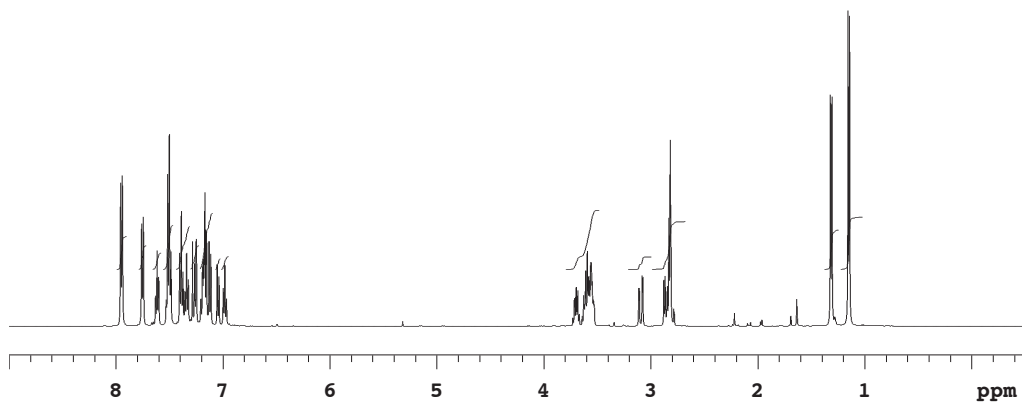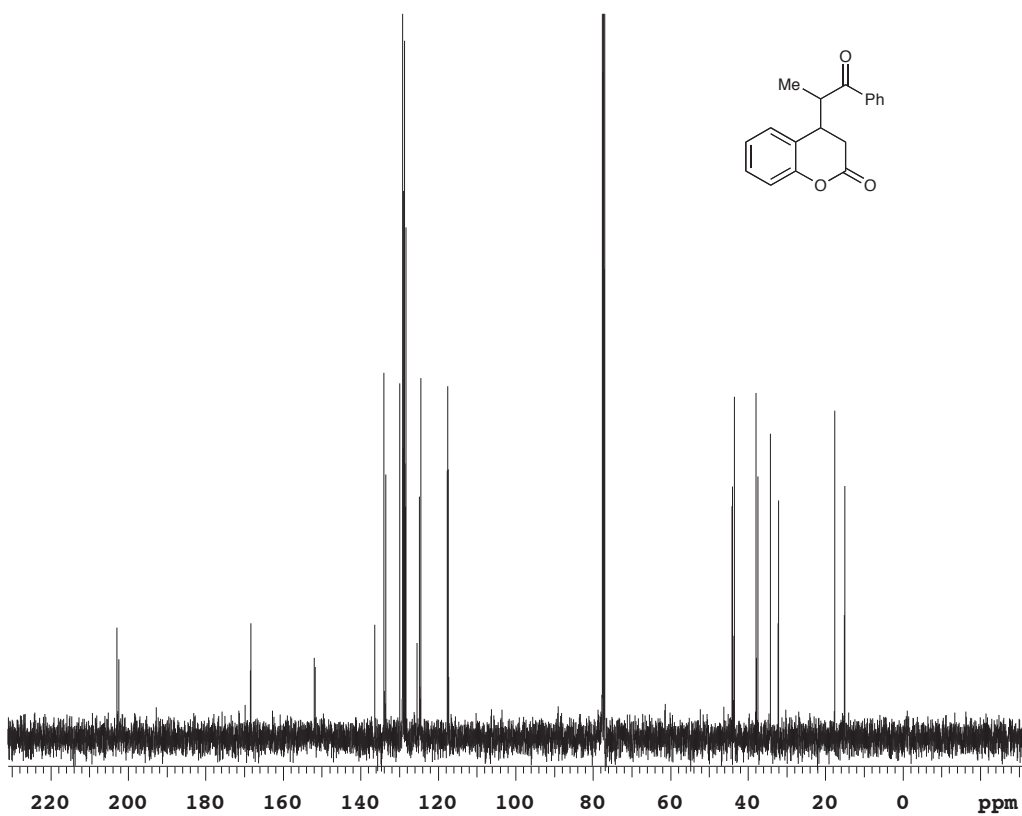

### Procedure and Mass Spectrometry of Crossover Experiment

To a flame-dried 25 mL round bottom flask equipped with a magnetic stirring bar, gas inlet tube, and septum was added aldehydes **1j** (27 mg, 0.1 mmol) and **1g** (28 mg, 0.1 mmol) and CH<sub>3</sub>CN (9 mL, 0.022 M). Then, a mixture containing azolium salt **C** (6 mg, 0.02 mmol), DBU (3  $\mu$ L, 0.02 mmol), and 1 mL CH<sub>3</sub>CN was added dropwise over 10 min via syringe. Upon consumption of the aldehydes, to the reaction was added 5 mL aqueous sat. NH<sub>4</sub>Cl and 20 mL CH<sub>2</sub>Cl<sub>2</sub>. The layers were then separated. The aqueous layer was washed with CH<sub>2</sub>Cl<sub>2</sub> (2 x 10 mL). The combined organics were dried over Na<sub>2</sub>SO<sub>4</sub>, filtered, and concentrated *in vacuo*. The crude mixture was then purified by flash column chromatography on silica gel (5 g SiO<sub>2</sub>) with 10% EtOAc in hexanes to 100% EtOAc as eluent to afford the corresponding 3,4-dihydrocoumarins as a mixture.

## Mass Spectrometry Data for 2j

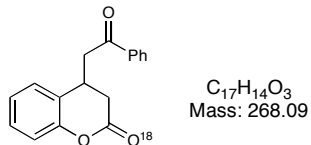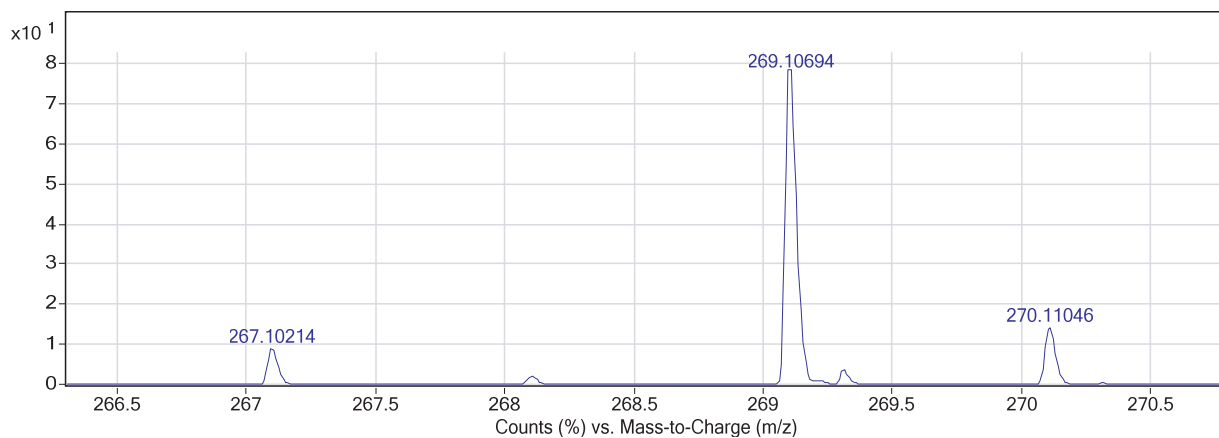

## Mass Spectrometry Data for 2g

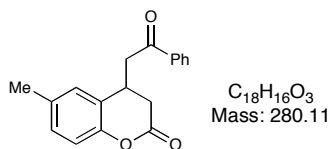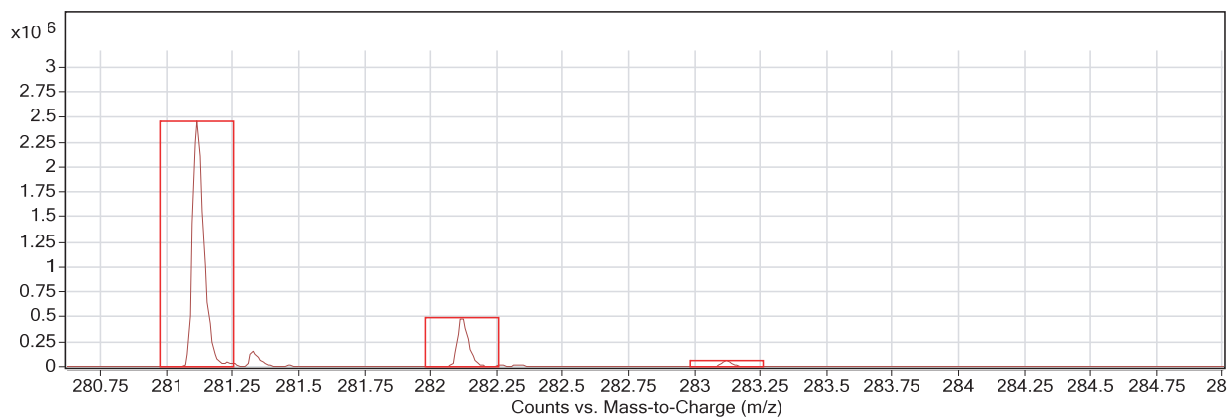

| mass peak | theoretical abundance % | observed abundance % |
|-----------|-------------------------|----------------------|
| 281.12    | 100                     | 100                  |
| 282.12    | 19.78                   | 18.88                |
| 283.12    | 2.47                    | 2.08                 |
| 284.13    | 0.23                    | —                    |

## Mass Spectrometry Data for crossover experiment with 1j and 1g

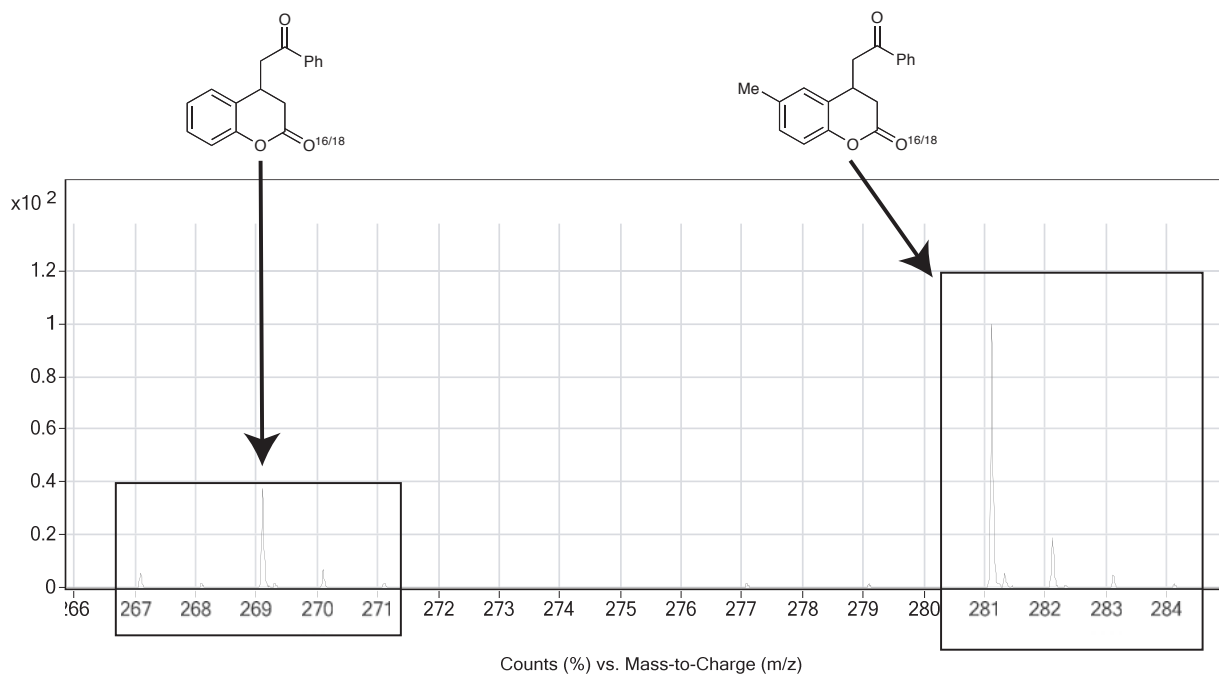

--- End of Report ---

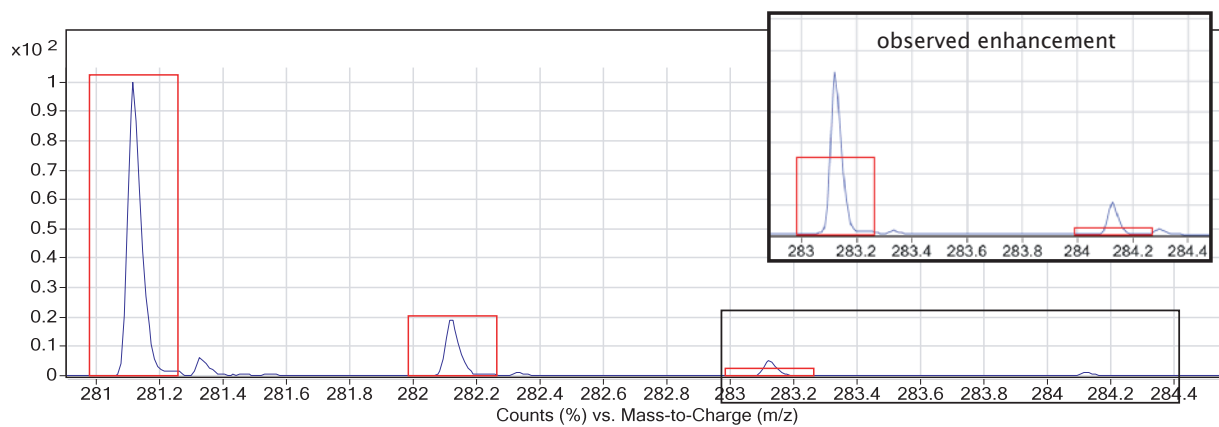

| mass peak | theoretical abundance % | Crossover abundance % |
|-----------|-------------------------|-----------------------|
| 281.12    | 100                     | 100                   |
| 282.12    | 19.78                   | 21.25                 |
| 283.12    | 2.47                    | <b>7.22</b>           |
| 284.13    | 0.23                    | <b>1.08</b>           |

**X-Ray Crystallography of 2b:**

X-ray diffraction was performed at  $-120\text{ }^{\circ}\text{C}$  and raw frame data were processed using SAINT. Molecular structure was solved using direct methods and refined by F2 by full-matrix least-squares techniques. The GOF = 1.057 for 193 variables refined to  $R1 = 0.0532$  for 2639 reflections with  $I > 2\sigma(I)$ . There was no absorption correction of Flack parameters. Further information is contained in the CIF file.

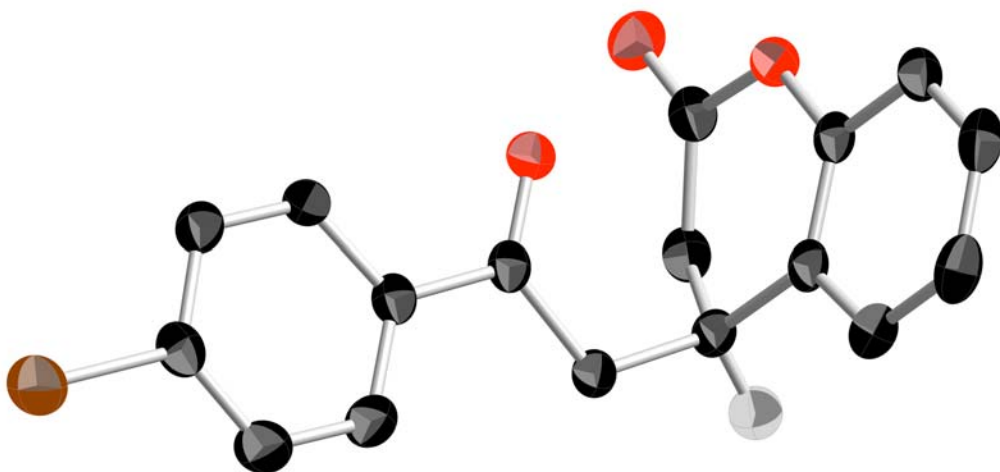

Supplement: NIHMS91473-supplement-1_si_001.pdf [file NIHMS91473-supplement-1_si_001.pdf]
